# Supplementary material
Source: Springer Nature journal article supplement (https://www.springermedizin.de/resource/supplementary/13058_2013_3583_MOESM16_ESM.pdf/9703864)
Supplement: MOESM16 [file 9703864]

Table 3. Targeted Q-PCR analysis of DMBA-treated mammary glands after 10 weeks on HFD vs. LFD

A Growth Factor Array HFD vs. LFD

| Symbol | Description                          | Fold change |
|--------|--------------------------------------|-------------|
| Bmp2   | Bone morphogenetic protein 2         | 2.0         |
| Bmp3   | Bone morphogenetic protein 3         | 2.4         |
| Fgf10  | Fibroblast growth factor 10          | 2.0         |
| Gdf10  | Growth differentiation factor 10     | 1.9         |
| Gdf5   | Growth differentiation factor 5      | 2.2         |
| Nodal  | Nodal                                | 2.4         |
| Pgf    | Placental growth factor              | 2.5         |
| Tgfa   | Transforming growth factor alpha     | 1.9         |
| Tgfb1  | Transforming growth factor, beta 1   | 1.9         |
| Vegfa  | Vascular endothelial growth factor A | 2.1         |
| Il1a   | Interleukin 1 alpha                  | 3.0         |
| Il1b   | Interleukin 1 beta                   | 2.1         |
| Il2    | Interleukin 2                        | 3.0         |
| Il7    | Interleukin 7                        | 3.4         |
| Cxcl12 | Chemokine (C-X-C motif) ligand 12    | 1.8         |

B Inflammation Array HFD vs. LFD

| Symbol | Description                        | Fold change |
|--------|------------------------------------|-------------|
| Ccl1   | Chemokine (C-C motif) ligand 1     | 4.5         |
| Ccl17  | Chemokine (C-C motif) ligand 17    | 3.2         |
| Ccl19  | Chemokine (C-C motif) ligand 19    | 7.5         |
| Ccl20  | Chemokine (C-C motif) ligand 20    | 5.2         |
| Ccl22  | Chemokine (C-C motif) ligand 22    | 7.6         |
| Il1b   | Interleukin 1 beta                 | 2.1         |
| Il2rb  | Interleukin 2 receptor, beta chain | 2.7         |
| Cxcr2  | Chemokine (C-X-C motif) receptor 2 | 4.3         |
| Lta    | Lymphotoxin A                      | 3.2         |
| Xcr1   | Chemokine (C motif) receptor 1     | 2.5         |

N=3 HFD mice, N=3 LFD mice  
 $p \leq 0.05$  for all genes listed
